# Supplementary material for: A human monoclonal antibody bivalently binding two different epitopes in streptococcal M protein mediates immune function
Source: PubMed Central journal article supplement (PMC9906385; doi:10.15252/emmm.202216208), 2022-12-12
Supplement: EMMM-15-e16208-s003.pdf [file EMMM-15-e16208-s003.pdf]

**Table of contents - Appendix**

Appendix Figure S1. Imaging-based whole blood phagocytosis.

Appendix Figure S2. DDA peptide spectra

Appendix Figure S3. SDS-PAGE analysis of the antibodies used for the binding assays.

Appendix Table S1. Statistical test p values.

Appendix Data 1. M protein amino acid sequences.

Appendix Data 2. M protein alignments.

A

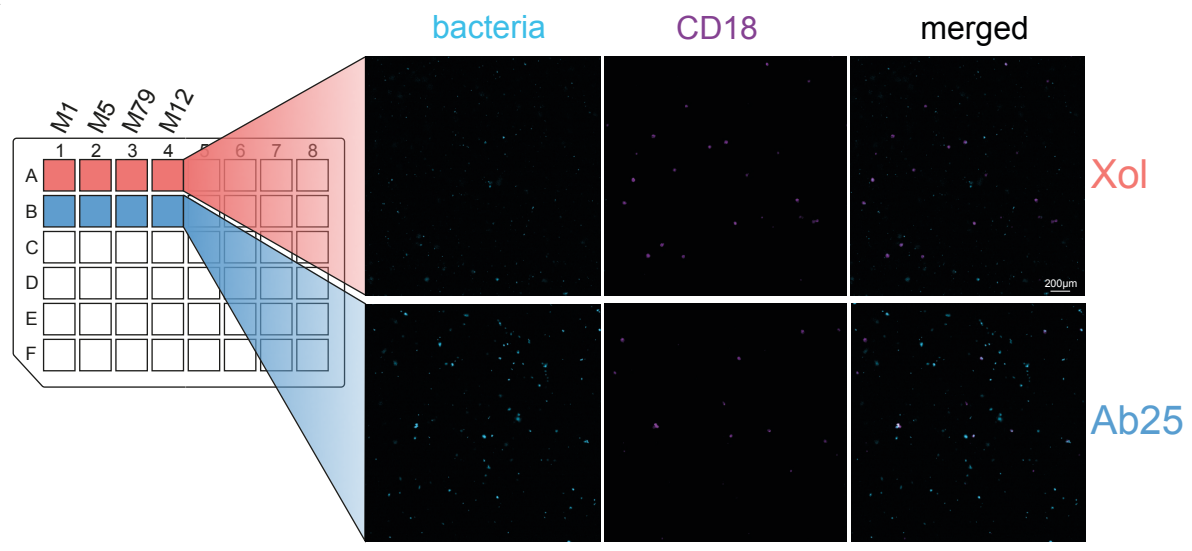

B

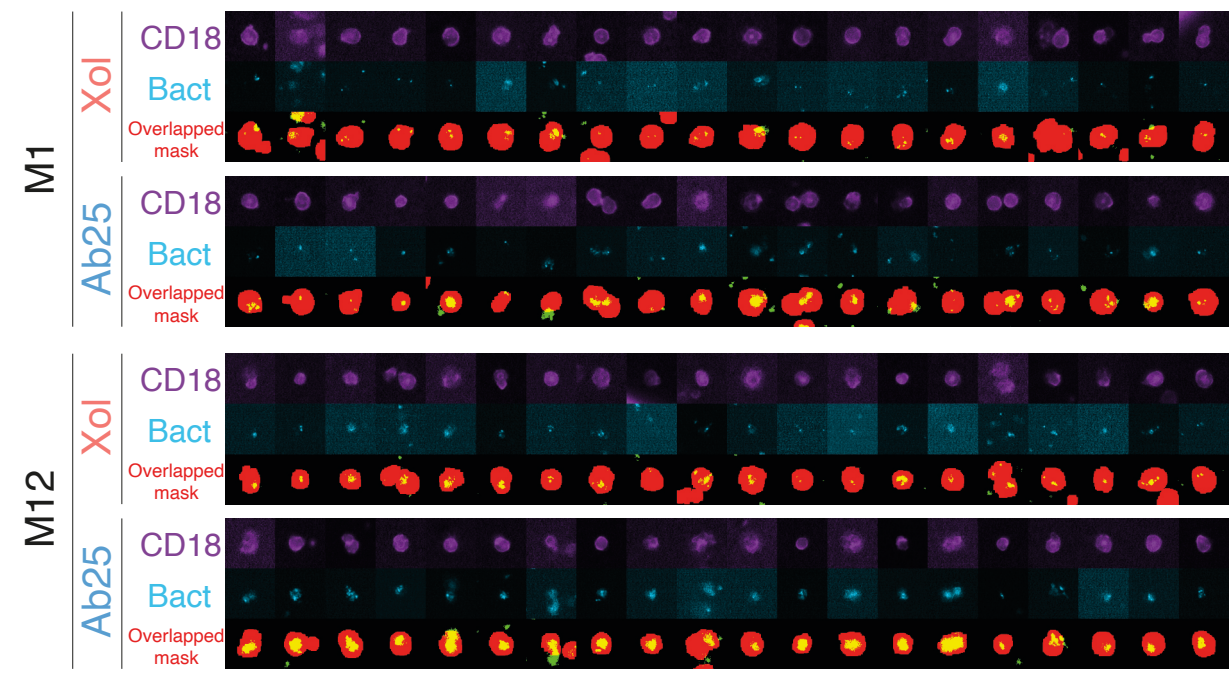

**Appendix Figure S1. Imaging-based whole blood phagocytosis.**

Imaging-based whole blood phagocytosis. A) Whole blood was diluted and infected with 4 different strains of GAS expressing GFP (FITC). After 30 minutes, the infection was fixed with PFA and the cells were stained with anti-CD18 (BV421, shown in magenta). The blood was immobilized onto glass-bottom 96-well plates which were precoated with anti-CD29. Images were acquired on a widefield epifluorescence microscope using a 20X objective (NA = 0.75). The acquisition of images was automated using Nikon JOBs by scanning through a 96 well plate acquiring 25 images/sample. GFP (bacteria) and BV421 (CD18 positive leukocytes) were segmented based on a signal above 5 and 4 std of the background respectively. The overlapping mask for both channels was generated and the area of overlap was measured. Contrast adjustment is set to the same for all shown images. More than 560 cells were analyzed for this experiment B) Magnified images of cells representative cells were randomly selected and compared side-by-side to highlight the GFP area change with and without pre-opsonization. The presented images are chosen from a dataset representing the median of each population. The differences seen across the two groups, therefore, are fully representative of the data shown in Fig 3F.

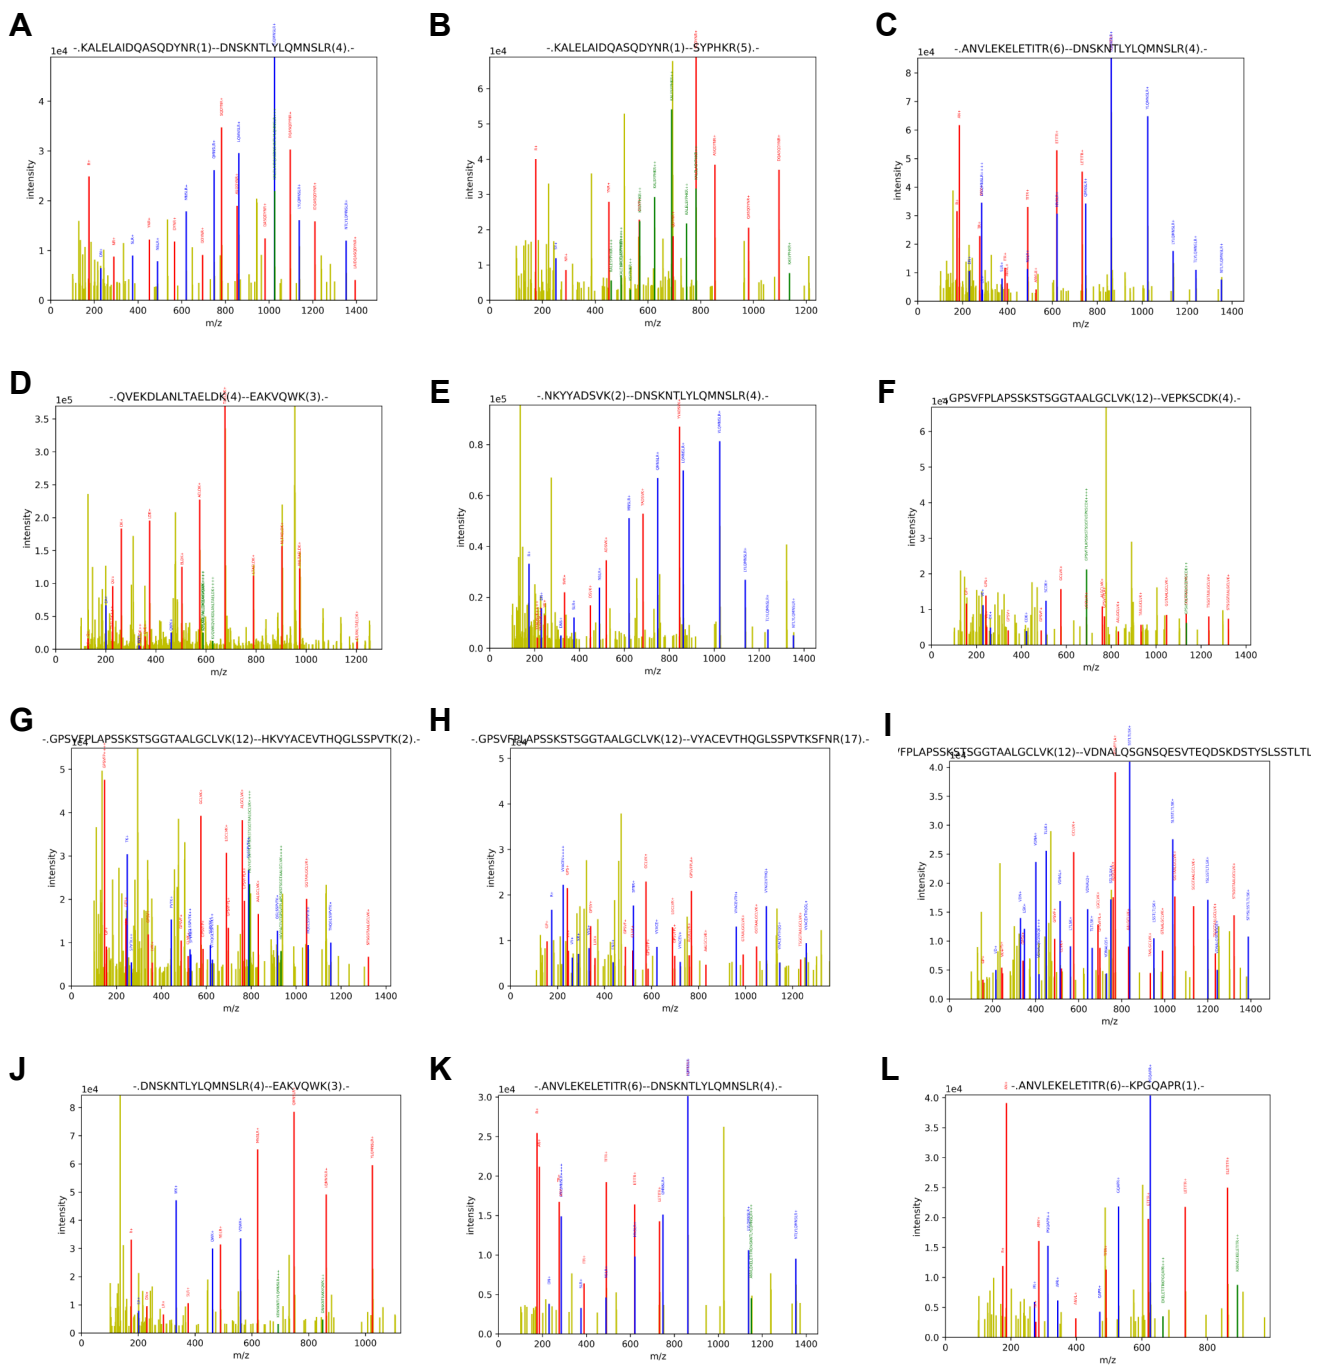

### Appendix Figure S2. DDA peptide spectra

Example DDA peptide spectra of cross-linked interactions identified (see also Table EV 1 for more details). One spectrum is shown for each cross-linked peptide pair. The red and the blue peptides represent parent peptides, respectively, whereas the green signal arises from the aforementioned peptides containing an additional DSS cross-linker arm.

## Antibody fragment generation

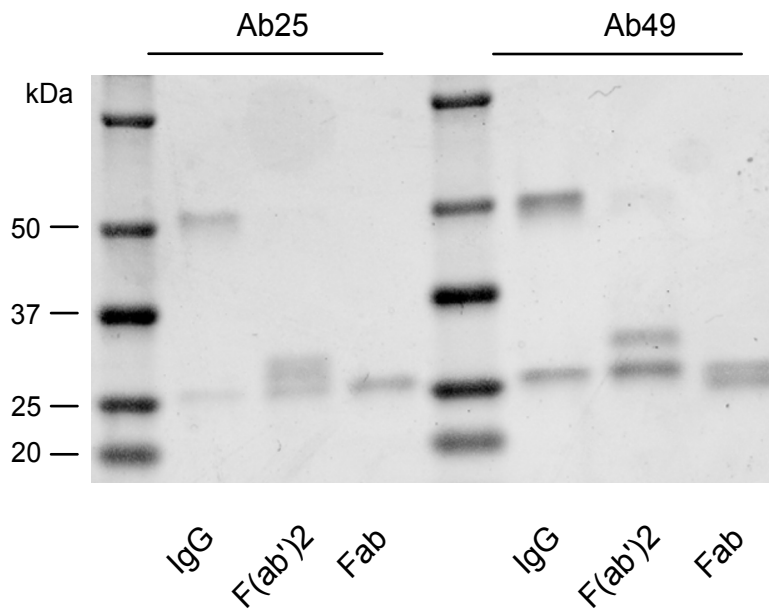

**Appendix Figure S3.** SDS-PAGE analysis of the antibodies used for the binding analysis

## Appendix Table S1 - p values

| Comparison                             | p value |
|----------------------------------------|---------|
| <b>Fig 2</b>                           |         |
| B                                      |         |
| Ab25 vs. Xolair                        | 0.0412  |
| Ab49 vs. Xolair                        | 0.0126  |
| E                                      |         |
| M1+xol vs. M1+Ab mix                   | 0.0001  |
| M1+xol vs. M1+Ab25                     | 0.0421  |
| <b>Fig 3</b>                           |         |
| B                                      |         |
| Xolair vs. IVIG                        | 0.0556  |
| Xolair vs. Ab25                        | 0.0032  |
| D                                      |         |
| Xolair vs. IVIG                        | 0.0292  |
| Xolair vs. Ab25                        | 0.0014  |
| F                                      |         |
| M1 Xol P1 vs. M1 Ab25 P1               | <0,0001 |
| M1 Xol P1 vs. M1 Ab25 P2               | <0,0001 |
| M1 Xol P1 vs. M1 Ab25 P3               | 0.9995  |
| M5 Xol P1 vs. M5 Ab25 P1               | 0.8371  |
| M5 Xol P2 vs. M5 Ab25 P2               | >0,9999 |
| M5 Xol P3 vs. M5 Ab25 P3               | >0,9999 |
| M12 Xol P1 vs. M12 Ab25 P1             | <0,0001 |
| M12 Xol P2 vs. M12 Ab25 P2             | <0,0001 |
| M12 Xol P3 vs. M12 Ab25 P3             | <0,0001 |
| M79 Xol P1 vs. M79 Ab25 P1             | <0,0001 |
| M79 Xol P2 vs. M79 Ab25 P2             | 0.9988  |
| M79 Xol P3 vs. M79 Ab25 P3             | 0.0322  |
| E                                      |         |
| Ab25 vs Xolair                         | <0,0001 |
| <b>Fig 4</b>                           |         |
| Liver                                  |         |
| IVIG vs Untreated                      | 0.0011  |
| Ab25 vs untreated                      | 0.0027  |
| Kidney                                 |         |
| IVIG vs Untreated                      | 0.0329  |
| Ab25 vs untreated                      | 0.0024  |
| Spleen                                 |         |
| IVIG vs Untreated                      | 0.0329  |
| Ab25 vs untreated                      | 0.0043  |
| <b>Fig 6</b>                           |         |
| A                                      |         |
| Untreated vs. Ab25                     | 0.0005  |
| Untreated vs. Ab32                     | 0.9607  |
| Untreated vs. Ab49                     | 0.4265  |
| Untreated vs. IVIG 10ug/ml             | 0.6491  |
| Untreated vs. IVIG 100ug/ml            | 0.8049  |
| B                                      |         |
| Xolair vs. Ab25                        | <0,0001 |
| Xolair vs. Ab25 fabs                   | 0.0784  |
| C                                      |         |
| Ab25 vs. Ab25 Ides                     | >0,9999 |
| Ab25 vs. Ab25 fabs                     | <0,0001 |
| Ab25 Ides vs. Ab25 fabs                | <0,0001 |
| Ab49 Ides vs. Ab49 fabs                | <0,0001 |
| Ab49 vs. Ab49 Ides                     | 0.3676  |
| Ab49 vs. Ab49 fabs                     | <0,0001 |
| D                                      |         |
| Plasma vs. Plasma fabs                 | <0,0001 |
| Plasma Ides vs. Plasma fabs            | <0,0001 |
| F                                      |         |
| M1                                     |         |
| Ab25 IgG vs. Ab25 Fabs                 | <0,0001 |
| Ab25 F(ab') <sub>2</sub> vs. Ab25 Fabs | 0.0001  |
| M5                                     |         |
| Ab25 IgG vs. Ab25 Fabs                 | 0.0031  |
| Ab25 F(ab') <sub>2</sub> vs. Ab25 Fabs | 0.0071  |
| M12                                    |         |
| Ab25 IgG vs. Ab25 Fabs                 | 0.005   |
| Ab25 F(ab') <sub>2</sub> vs. Ab25 Fabs | 0.2286  |
| M79                                    |         |
| Ab25 IgG vs. Ab25 Fabs                 | <0,0001 |
| Ab25 F(ab') <sub>2</sub> vs. Ab25 Fabs | <0,0001 |
| <b>Fig EV 2</b>                        |         |
| Xolair vs. Ab25                        | 0.0001  |
| Xolair vs. Ab32                        | 0.0002  |
| Xolair vs. Ab49                        | 0.0002  |
| Xolair vs. Plasma                      | <0,0001 |

**Data EV1. M protein sequences**

|                 |                                                                                                                                                                                                                                                                                                                                                                                                                                                                                                                                                                                                                                                                                                                                                                                                                                                                                                                                      |
|-----------------|--------------------------------------------------------------------------------------------------------------------------------------------------------------------------------------------------------------------------------------------------------------------------------------------------------------------------------------------------------------------------------------------------------------------------------------------------------------------------------------------------------------------------------------------------------------------------------------------------------------------------------------------------------------------------------------------------------------------------------------------------------------------------------------------------------------------------------------------------------------------------------------------------------------------------------------|
| M1-90-226-CTG   | <p>&gt;gene_1147 GeneMark.hmm 306_aa + 113293 114210<br/>                 &gt;NODE_5_length_114211_cov_48.735082<br/>                 MAKNNNTNRHYSRLRKLKTGTASVAVALTVLGAGFANQTEVKANGDGNPREVIEDLAANNPA<br/>                 IQNIRLRHENKDLKARLENAMEVAGRDFKRAEELEKAKQALEDQRKDLETKLKELQQDYD<br/>                 LAKESTSWDRQRLEKELEEKKEALELAIDQASRDYHRATALEKELEEKKKALELAIDQAS<br/>                 QDYNRANVLEKELETITREQEINRNLLGNAKLELDQLSSEKEQLTIEKAKLEEEKQISDA<br/>                 SRQSLRRDLASREAKKQVEKDLANLTAELDKVKEEKQISDASRQGLRRDLASREAKKQ<br/>                 VEKDLA</p>                                                                                                                                                                                                                                                                                                                                                           |
| M4-BS4-CTG      | <p>&gt;gene_436 GeneMark.hmm 222_aa + 185954 186619<br/>                 &gt;NODE_2_length_186620_cov_148.285713<br/>                 MARKDTNKQYSLRKLKTGTASVAVAVAVLGAGFANQTEVKAAEIKKPQADSAWNWPKEYN<br/>                 ALLKENEELKVEREKYLSYADDKEKDPQYRALMGENQDLRREGQYQDKIEELEKERKEK<br/>                 QERQEQLERQYQIEADKHYQEQQKKHQEQEQQLAEKQKLAQKQISDASRQGLSRDLEA<br/>                 SREAKKKVEADLAALTAEHQKLKEDKQISDASRQGLSRDLEA</p>                                                                                                                                                                                                                                                                                                                                                                                                                                                                                              |
| M5-Manfredo-CTG | <p>&gt;gene_1398 GeneMark.hmm 194_aa + 61232 61813<br/>                 &gt;NODE_10_length_61815_cov_235.110363<br/>                 MARENTNKHYSRLRKLKGTASVAVALSVLGAGLVVNTNEVSAAVTRGTINDPQRAKEALD<br/>                 KYELNHDLKTKNEGLKTENEGKLTENEGKLTENEGKTEKKEHEAENDKQQRDTLST<br/>                 QKETLREVVQNTQYNNETLKIKNGLTKELNKTROELANKQEQSKENEKALNELLEKTVK<br/>                 DKIAKEQENKETIG</p>                                                                                                                                                                                                                                                                                                                                                                                                                                                                                                                             |
| M8-BB3-CTG      | <p>&gt;gene_1160 GeneMark.hmm 238_aa - 2 715<br/>                 &gt;NODE_7_length_101418_cov_178.048943<br/>                 MARKDTNKQYSLRKLKTGTASVAVAVAVLGAGFANQTEVKAESPESHISISNEQLINELN<br/>                 DLIEENNDLKDKLARNLDLLDNTREKDPQYRALMGENQDLREKEGKYQDKIKKLEEKEN<br/>                 LEKKSSEDVERHYLKKLDQEHKEQERQKNLEELERQSREIDKRYQEQLQKQQQLETEKQ<br/>                 ISEASRKSLSRDLEASRAAKKDLEAEHQKLKEEKQISDASRQGLSRDLEASREAKKKV</p>                                                                                                                                                                                                                                                                                                                                                                                                                                                                                    |
| M12-BS3-CTG     | <p>&gt;gene_1710 GeneMark.hmm 575_aa + 13619 15346<br/>                 &gt;NODE_21_length_15967_cov_54.040096<br/>                 MAKNTTNRHYSRLRKLKTGTASVAVALTVVGAGLVAGQTVRADHSDLVAEKQRLEDLGQKF<br/>                 ERLKQRSELYLQQYYDNKSNQYKGDWVYVQQLKMLNRDLEQAYNELSGEAHKDALGKLGID<br/>                 NADLKAKITELEKSVEEKNDVLSQIKKELEEAEKDIQFGREVHAADLLRHKQEI AEKENV<br/>                 ISKLNQELQPLKQVDETRNLQEQEKQKVLSEQLAVTKENAKKDFELAALGHQLADKE<br/>                 YNAKIAELESKLADAKKDFELAALGHQHAHNEYQAKLAEKDQKQLEEQQKILDASRKG<br/>                 TARDLEAVRQAKKATEAELNLLKAEALAKVTEQKQILDASRKG TARDLEAVRKAQAQVEAA<br/>                 LKQLEEQNKISEASRKLRRDLASREAKKQVEKDLANLTAELDKVKEEKQISDASRQGL<br/>                 RRDLDASREAKKQVEKALEANSKLALEKLNKELEESKLTKEKAELQAKLAEAKAL<br/>                 KEQLAKQAEELAKLRAGKASDSQTPDAKPGNKAVPGKGQAPQAGTKPNQNKAPMKETKRQ<br/>                 LPSTGEAANPFFTAALVMATAGVAAVVKKREEN</p> |
| M28-BB5-CTG     | <p>&gt;gene_950 GeneMark.hmm 358_aa - 4735 5811<br/>                 &gt;NODE_5_length_210162_cov_207.134746<br/>                 MARKDTNKQYSLRKLKTGTASVAVAVAVLGAGFANQTEVKAESPSTETSANGADKLAD<br/>                 AYNTLLTEHEKLRDEYTLIDAKKEEPRYKALRGENQDLREKEGKYQDKIKKLEEKENL<br/>                 EKKSEDVERHYLKKLDQEHKEQEERQKNLEELERQSREIDKRYQEQLQKQQQLETEKQI<br/>                 SEASRKSLSRDLEASRAAKKDLEAEHQKLKEEKQISDASRQGLSRDLEASREAKKKVEAD<br/>                 LAEANSKLQALEKLNKELEEGKLLSEKEKAELQARLEAEAKALKEQLAKQAEELAKLGN<br/>                 QTPNAKVAPQANRSRSAMTQQKRTL PSTGEAANPFFTAATAATVMVSAGMLALKRKEEN</p>                                                                                                                                                                                                                                                                                                               |
| M75-BS7-CTG     | <p>&gt;gene_561 GeneMark.hmm 387_aa - 31358 32521<br/>                 &gt;NODE_3_length_208685_cov_62.045909<br/>                 MARKDTNKQYSLRKLKTGTASVAVAVAVLGAGFANQTEVKAEEERTFTELPYEARYKAWK<br/>                 SENDELRENYRRTLDKFNTEQGGKTRLEEQNKKLHSELASVTETLTSVTEADDKIKDLT<br/>                 DRDKISSNLLGNAKDQINKLTTEKDTLAEKAKKLEEDKQISDASRKSLSRDLEASRAAKK<br/>                 ELEANHQKLETEHKKLKEEKQISDASRQGLSRDLEASREAKKKVEADLAALTAEHQKLKE<br/>                 EKQISDASRQGLSRDLEASREAKKKVEADLAEANSKLQALEKLNKELEEGKLLSEKEKAE<br/>                 LQARLEAEAKALKEQLAKQAEELAKLGNQTPNAKVAPQANRSRSAMTQQKRTL PSTGEA<br/>                 ANPFFTAATAATVMVSAGMLALKRKEEN</p>                                                                                                                                                                                                                                                       |

|               |                                                                                                                                                                                                                                                                                                                                                                                                                                                                                                                                                                                                   |
|---------------|---------------------------------------------------------------------------------------------------------------------------------------------------------------------------------------------------------------------------------------------------------------------------------------------------------------------------------------------------------------------------------------------------------------------------------------------------------------------------------------------------------------------------------------------------------------------------------------------------|
| M79-BTS4-CTG  | <p>&gt;gene_435 GeneMark.hmm 222_aa + 185954 186619<br/> &gt;NODE_2_length_186620_cov_58.625015<br/> MARKDTNKQYSLRKLKTGTASVAVAVAVLGAGFANQTEVKAEEIKKPQADSAWNWPKEYN<br/> ALLKENEELKVEREKYLSYADDKEKDPQYRALMGENQDLRKREGQYQDKIEELEKERKEK<br/> QERQEQLERQYQIEADKHQYEQQKKHQEQEQQLEAEKQKLAQKQSDASRQGLSRDLEA<br/> SREAKKKVEADLAALTAEHQKLEKEDKQISDASRQGLSRDLEA</p>                                                                                                                                                                                                                                          |
| M81-BB6-CTG   | <p>&gt;gene_94 GeneMark.hmm 396_aa - 101371 102561<br/> &gt;NODE_1_length_190029_cov_107.359270<br/> MVRKDTNKQYSLRKLKTGTASVAVAVAVLGAGFANQTEVKAAGSEENVPKQQYNALWEEN<br/> EDLRGRERKYIAKLEKEEIQNGELNEKNRLEADIADLQDVIEDNDQEIKRKDRMYEAF<br/> KQSKDQVKDLTAEKDTLAEKAKKLEEDKQISDASRKSLSRDLEGSRAAKKELEAKHQKLE<br/> TEHQKLEKEDKQISDASRQGLSRDLEASREAKKKVEADLAALTAEHQKLEEKQISDASRQ<br/> GLSRDLEASREAKKKVEADLAEANSKLQALEKLNKELEEGKKLSEKEKAELQARLEAEAK<br/> ALKEQLAKQAEELAKLRAGKASDSQTPDAKPGNKVVPKGQAPQAGTKPNQNKAPMKETK<br/> RQLPSTGEAANPFFATAAATVMVSAGMLALKRKEEN</p>                                            |
| M85-SP5-CTG   | <p>&gt;gene_158 GeneMark.hmm 402_aa - 835 2043<br/> &gt;NODE_2_length_119743_cov_614.138920<br/> MVRKDTNKQYSLRKLKTGTASVAVAVAVLGAGFANQTEVKAEEQRAPOAKGTSVSADLYN<br/> SLWDENKTLREKQGEYITKIQNEETKNKELDKNKELDSRVTDLIDVIEHDDQELERKER<br/> MYEAFKQSKDQVNNLTAEKDTLAEKAKKLEEDKQISDASRKSLSRDLEGSRAAKKELEA<br/> KHQKLETEHQKLEKEDKQISDASRQGLSRDLEASREAKKKVEADLAALTAEHQKLEEKQI<br/> SDASRQGLSRDLEASREAKKKVEADLAEANSKLQALEKLNKELEEGKKLSEKEKAELQAR<br/> LEAEAKALKEQLAKQAEELAKLRAGKASDSQTPDAKPGNKVVPKGQAPQAGTKPNQNK<br/> PMKETKRQLPSTGEAANPFFATAAATVMVSAGMLALKRKEEN</p>                                           |
| M87-BB10-CTG  | <p>&gt;gene_1714 GeneMark.hmm 238_aa - 3 716<br/> &gt;NODE_26_length_15865_cov_62.755661<br/> MARKDTNKQYSLRKLKTGTASVAVAVAVLGAGFANQTEVKAESPREVTNELAASVWKKKV<br/> EEAKEKASKLEKQLEEAQKDYSEIEGKLEQFWHDYDKLEKENKEYASQLGKNQEEREKLE<br/> LEYLRKSDEEYKEHQYRQEQEERQKNLEELERQNKREIDKRYQEQLKQKQQLLETEKQIS<br/> EASRKSLSRDLEASRAAKKELEAEHQKLEEKQISDASRKSLSRDLEASREAKKKVEA</p>                                                                                                                                                                                                                                 |
| M89-BSA4-CTG  | <p>&gt;gene_1171 GeneMark.hmm 244_aa - 2 733<br/> &gt;NODE_8_length_78604_cov_108.090657<br/> MARKDTNKQYSLRKLKTGTASVAVAVAVLGAGFANQTTVKADSDNINRSVSKDNEKELH<br/> NKIADLEEERGEHLKIDELKEELKAKEKSENVERHYLRKLDQYKEQKERQKNLEELE<br/> RQSQRVEVKRYQEQLKQKQQLLETEKQISEASRKSLSRDLEASRAAKKDLEAEHQKLEEK<br/> QISDASRQGLSRDLEASREAKKKVEADLAALTAEHQKLEEKQISDASRQGLSRDLEASR<br/> EAKK</p>                                                                                                                                                                                                                         |
| M118-SP1-CTG  | <p>&gt;gene_1703 GeneMark.hmm 332_aa - 4820 5818<br/> &gt;NODE_14_length_20826_cov_45.853546<br/> MARKDTNKQYSLRKLKTGTASVAVAVAVLGAGFANQTEVKAEEKVEVADSNASSVAKLY<br/> NQIADLTDKNGEYLERIEELEERQKNLEKLERQSQVAADKHQYEQVKKHQEYKQEQEERQ<br/> KNLEELERQNKREIDKRYQEQLKQKQQLLETEKQISEASRKSLSRDLEASRAAKKDLEAEH<br/> QKLEEKQISDASRQGLSRDLEASREAKKKVEADLAEANSKLQALEKLNKELEEGKKLSE<br/> KEKAELQAKLEAEAKALKEQLAKQAEELAKLGNQTPNAKVAPQANRSRSAMTQQKRTLP<br/> STGETANPFFATAAATVMVSAGMLALKRKEEN</p>                                                                                                                    |
| M179-BB12-CTG | <p>&gt;gene_92 GeneMark.hmm 433_aa - 100604 101905<br/> &gt;NODE_1_length_264627_cov_344.813212<br/> MVRKDTNRHYSRLRKLKTGTASVAVALSVLGAGLAVNQTEVSAKSVTRSTAQDPDKSRQAI<br/> TEYEVENHKLQEKNALNTRNQELTDENGELKTANEALRQRGDTLNFQRVKLEKQVQEKE<br/> HNNKTLKIENGELKTENGDLTKKLEDETRQELANKQQESKENEKTLNELLEKTVKDIAKE<br/> QENKETIGTLKLLDETVKDIAKEQKSKQDFGALKQELAKKEEQNKISDASRQGLRRDL<br/> NASREAKKQVEKDLANLTAELDKVKEEKQVSDASRQGLRRDLASREAKKQVEKALEEAN<br/> SKLAALEKLNKELEESKKLTEKEKAELQAKLEAEAKALKEKLAKQAEELAKLRAGKASDS<br/> QTPDAKPGNKAVPGKGQAPQAGTKPNQNKAPMKETKRQLPSTGEAANPFFATAAALTMAT<br/> AGVAAVVKRKKEN</p> |























```

#####
# Program: needle
# Commandline: needle
#   -auto
#   -stdout
# -asequence emboss_needle-I20210916-190502-0908-95709551-p1m.asequence
# -bsequence emboss_needle-I20210916-190502-0908-95709551-p1m.bsequence
# -datafile EBLOSUM62
# -gapopen 10.0
# -gapextend 0.5
# -endopen 10.0
# -endextend 0.5
# -aformat3 pair
# -sprotein1
# -sprotein2
# Align_format: pair
# Report_file: stdout
#####

=====
# Aligned_sequences: 2
# 1: Reference_M1_sequence
# 2: M89_sequence
# Matrix: EBLOSUM62
# Gap_penalty: 10.0
# Extend_penalty: 0.5
#
# Length: 487
# Identity:      148/487 (30.4%)
# Similarity:    191/487 (39.2%)
# Gaps:          246/487 (50.5%)
# Score: 574.0
=====

Reference_M1_      1 MAKNNNTRHYSLRKLTGTASVAVALTVLGAGFANQTEVKANGDGNPREV      50
                   ||:..|:|.|||||:|||||:|.|||||:|.||:|.|||.||
M89_sequence       1 MARKDTNKQYSLRKLKGTASVAVAVAVLGAGFANQTTVKADSDNINRSV      50

Reference_M1_     51 IEDLAANNPAIQNIRLRYENKDLKARLENAMVAGRDFKRAEELEKAKQA      100
                   :
M89_sequence       51 -----S                                                    51

Reference_M1_     101 LEDQRKDLETKLKELOQDYDLAKESTSWDRQRLEK--ELEEKKEALELAI      148
                   :|.||:|.||:|.||:|.||:|.||:|.||:|.||:|.||:|.||:|.||:|.||
M89_sequence       52 VKDNEKELHNKIADLEEERG-----EHLDKIDELKEELKAKEKSS      91

Reference_M1_     149 DQASRDYHRATALE-KELEEKKKALELAIDQASQDYNRANVLEKELETIT      197
                   :...|.||:|.|||.||:|.||:|.||:|.||:|.||:|.||:|.||:|.||
M89_sequence       92 ENVERHYLRKLDQEYKEQERQKNLE-ELERQSQ-----REVEKRY      131

Reference_M1_     198 REQEINRNLLGNAKLELDQLSSEKEQLTIEKAKLEEEKQISDASRQSLRR      247
                   :|| .:|:| :||.||||:|:|:|.||
M89_sequence       132 QEQ-----LQKQQ-----QLETEKQISEASRKSLSR      157

Reference_M1_     248 DLDASREAKKQVEKDLANLTAELDKVKEDKQISDASRQGLRRDLASREA      297
                   ||:|:|.|||.||:|.||:|.||:|.||:|.||:|.||:|.||:|.||
M89_sequence       158 DLEASRAAKKDL-----AEHQKLEEKQISDASRQGLSRDLEASREA      200

Reference_M1_     298 KKQVEKDLANLTAELDKVKEEKQISDASRQGLRRDLASREAKKQVEKAL      347
                   ||:|:|.|||.|||.||:|.||:|.||:|.||:|.||:|.||:|.||
M89_sequence       201 KKKVEADLAALTAEHQKLEEKQISDASRQGLSRDLEASREAKK-----      244

Reference_M1_     348 EEANSKLALEKLNKELEESKLLTEKEKAEQAKLEAEAKALKEQLAKQA      397
M89_sequence       245 -----      244

Reference_M1_     398 EELAKLRAGKASDSQTPDTKPGNKAVPGKGQAPQAGTKPNQNKAPMKETK      447
M89_sequence       245 -----      244

Reference_M1_     448 RQLPSTGETANPFFTAALTVMATAGVAAVVKRKEEN      484
M89_sequence       245 -----      244

#-----
#-----

```

```

#####
# Program: needle
# Commandline: needle
#   -auto
#   -stdout
#   -asequence emboss_needle-I20210916-190546-0891-61986443-p2m.asequence
#   -bsequence emboss_needle-I20210916-190546-0891-61986443-p2m.bsequence
#   -datafile EBLOSUM62
#   -gapopen 10.0
#   -gapextend 0.5
#   -endopen 10.0
#   -endextend 0.5
#   -aformat3 pair
#   -sprotein1
#   -sprotein2
# Align_format: pair
# Report_file: stdout
#####

=====
# Aligned_sequences: 2
# 1: Reference_M1_sequence
# 2: M179_sequence
# Matrix: EBLOSUM62
# Gap_penalty: 10.0
# Extend_penalty: 0.5
#
# Length: 498
# Identity:      294/498 (59.0%)
# Similarity:   332/498 (66.7%)
# Gaps:         79/498 (15.9%)
# Score: 1218.5
=====

Reference_M1_      1 MAKNNNTNRHYSLRKLTGTASVAVALTVLGAGFA-NQTEVKANGDGNPRE      49
M179_sequence     1 MVRKDTNRHYSLRKLTGTASVAVALSVLGAGLAVNQTEVSAK--SVTRS      48
Reference_M1_     50 VIEDLAANNPAIQNIRLRYENKDLKARLE-NAMEVAGRDFKRAEELEKAK      98
M179_sequence     49 TAQDPDKSRQAI----TEYEVENHKLQEKNA-----LTNRN          81
Reference_M1_     99 QALEDQRKDLETKLKELQDYDLAKESTSWDRQRLEKELEEEK----- 141
M179_sequence     82 QELTDENGELKTANEALRQRGDTLFDN---QVRKLEKQVQEKHNKTLK    127
Reference_M1_    142 -EALELAIDQASRDYHRATALEKELEKKALELAIDQASQDYNRA---N    187
M179_sequence    128 IENGELKTENGD-----LTKKLDETRQ--ELANKQQESKENEKTLNE    167
Reference_M1_    188 VLEKEL-ETITREQEINRNLLGNAKLELDQLSSEKEQLTIEKAKLEEEKQ   236
M179_sequence    168 LLEKTVKDKIAKEQE-NKETIGTLKLLDETVKDK-----IAKEQKSKQ   210
Reference_M1_    237 ISDASRQLRRDLASREAKKQVEKDLANLTAELDKVKEDKQISDASRQG   286
M179_sequence    211 -----DFGALKQELAKKEEQNKISDASRQG   235
Reference_M1_    287 LRRDLASREAKKQVEKDLANLTAELDKVKEEKQISDASRQGLRRDLAS   336
M179_sequence    236 LRRDLNASREAKKQVEKDLANLTAELDKVKEEKQVSDASRQGLRRDLAS   285
Reference_M1_    337 REAKKQVEKALEEANSKLAALEKLNKELEESKKLTEKEKAELQAKLEAEA   386
M179_sequence    286 REAKKQVEKALEEANSKLAALEKLNKELEESKKLTEKEKAELQAKLEAEA   335
Reference_M1_    387 KALKEQLAKQAEELAKLRAGKASDSQTPDTKPGNKAVPGKGQAPQAGTKP   436
M179_sequence    336 KALKEQLAKQAEELAKLRAGKASDSQTPDAKPGNKAVPGKGQAPQAGTKP   385
Reference_M1_    437 NQNKAPMKETKRQLPSTGETANPFFTAALTVMATAGVAAVVKKREEN     484
M179_sequence    386 NQNKAPMKETKRQLPSTGEAANPFFTAALTVMATAGVAAVVKKKEN     433

#-----
#-----

```

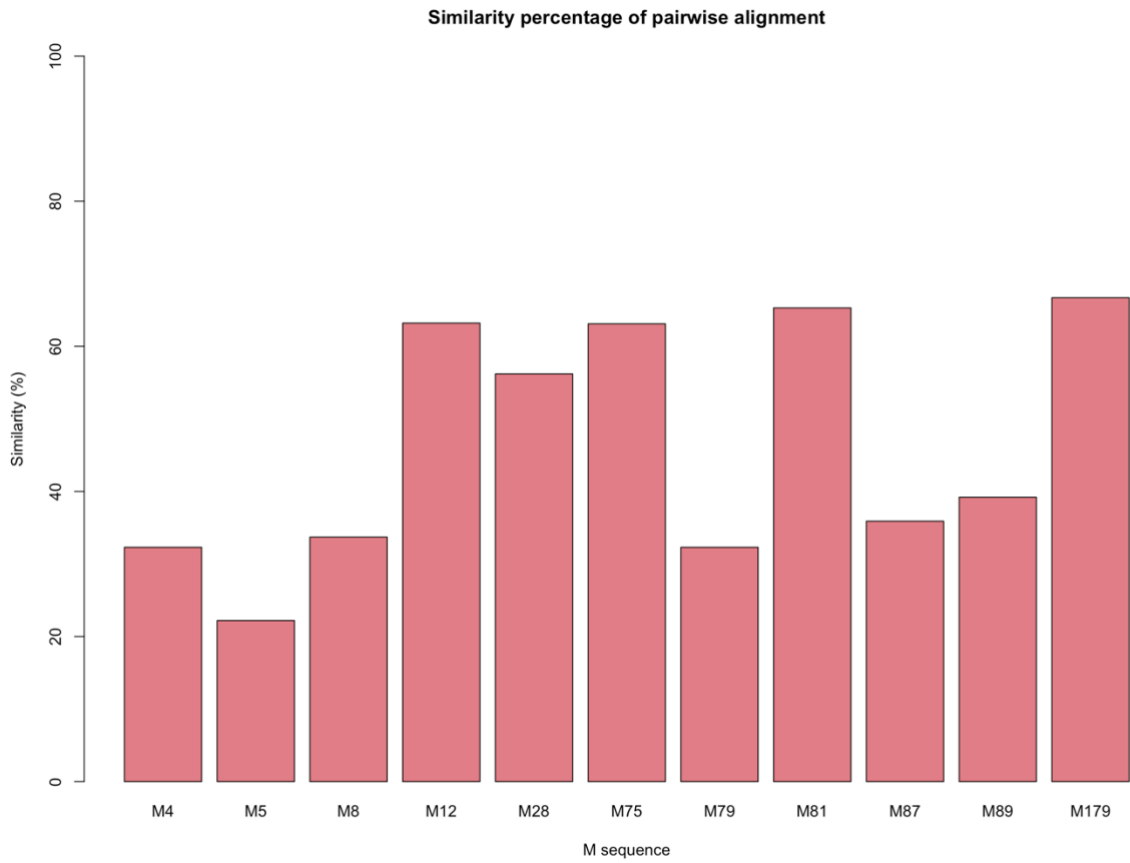

*Figure S1. Similarity percentage for each M sequence aligned to M1 reference sequence*

## Binding peptides similarity in each sequence

Here, only the two peptides of M1 protein in the binding interface with ab25 *i.e.*, “KALELAIDQASQDYNRANVLEKE”, and “REAKKQVEKDLANLTAELDKVKE” were searched in each target M sequence to detect the similar patterns. Below, we report the result of the alignment and the similarity percentage with each of the detected peptides.

```
#####
# Program: needle
# Commandline: needle
#   -auto
#   -stdout
#   -asequence emboss_needle-I20210917-134146-0008-34466034-plm.asequence
#   -bsequence emboss_needle-I20210917-134146-0008-34466034-plm.bsequence
#   -datafile EBLOSUM62
#   -gapopen 10.0
#   -gapextend 0.5
#   -endopen 10.0
#   -endextend 0.5
#   -aformat3 pair
#   -sprotein1
#   -sprotein2
# Align_format: pair
# Report_file: stdout
#####

#=====
#
# Aligned_sequences: 2
# 1: Binding_pep1
# 2: M4_similar_p1
# Matrix: EBLOSUM62
# Gap_penalty: 10.0
# Extend_penalty: 0.5
#
# Length: 26
# Identity:      10/26 (38.5%)
# Similarity:    12/26 (46.2%)
# Gaps:          3/26 (11.5%)
# Score: 29.0
#
#
#=====

Binding_pep1      1 KALELAIDQASQDYN---RANVLEKE      23
                   ||.:...||...:|  ..|.|.||
M4_similar_p1    1 KAAEIKKPQADSAWNWPKEYNALLKE      26

#-----
#-----
```

```
#####
# Program: needle
# Commandline: needle
#   -auto
#   -stdout
#   -asequence emboss_needle-I20210917-134735-0837-62507407-plm.asequence
#   -bsequence emboss_needle-I20210917-134735-0837-62507407-plm.bsequence
#   -datafile EBLOSUM62
#   -gapopen 10.0
#   -gapextend 0.5
#   -endopen 10.0
#   -endextend 0.5
#   -aformat3 pair
#   -sprotein1
#   -sprotein2
# Align_format: pair
# Report_file: stdout
#####
```

```
#=====
#
# Aligned_sequences: 2
# 1: Binding_pep2
# 2: M4_similar_p2
# Matrix: EBLOSUM62
# Gap_penalty: 10.0
# Extend_penalty: 0.5
#
# Length: 23
# Identity:      17/23 (73.9%)
# Similarity:   19/23 (82.6%)
# Gaps:         0/23 ( 0.0%)
# Score: 76.0
#
#
#=====
```

```
Binding_pep2      1 REAKKQVEKDLANLTAELDKVKE      23
                   |||||:|.|||.||||..|:|
M4_similar_p2    1 REAKKKVEADLAALTAEHQKLKE      23
```

```
#-----
#-----
```

```
#####
# Program: needle
# Commandline: needle
#   -auto
#   -stdout
#   -asequence emboss_needle-I20210917-135430-0963-60062530-p2m.asequence
#   -bsequence emboss_needle-I20210917-135430-0963-60062530-p2m.bsequence
#   -datafile EBLOSUM62
#   -gapopen 10.0
#   -gapextend 0.5
#   -endopen 10.0
#   -endextend 0.5
#   -aformat3 pair
#   -sprotein1
#   -sprotein2
# Align_format: pair
# Report_file: stdout
#####
```

```
#=====
#
# Aligned_sequences: 2
# 1: Binding_pep1
# 2: M5_similar_p1
# Matrix: EBLOSUM62
# Gap_penalty: 10.0
# Extend_penalty: 0.5
#
# Length: 23
# Identity:      6/23 (26.1%)
# Similarity:    10/23 (43.5%)
# Gaps:          0/23 ( 0.0%)
# Score: 17.0
#
#
#=====
```

```
Binding_pep1      1 KALELAIDQASQDYNRANVLEKE      23
                   |||...:~::~|.....||
M5_similar_p1    1 KALNELLEKTVKDKIAKEQENKE      23
```

```
#-----
#-----
```

```
#####
# Program: needle
# Commandline: needle
#   -auto
#   -stdout
#   -asequence emboss_needle-I20210917-135546-0415-63161967-p2m.asequence
#   -bsequence emboss_needle-I20210917-135546-0415-63161967-p2m.bsequence
#   -datafile EBLOSUM62
#   -gapopen 10.0
#   -gapextend 0.5
#   -endopen 10.0
#   -endextend 0.5
#   -aformat3 pair
#   -sprotein1
#   -sprotein2
# Align_format: pair
# Report_file: stdout
#####
```

```
#=====
#
# Aligned_sequences: 2
# 1: Binding_pep2
# 2: M5_similar_p2
# Matrix: EBLOSUM62
# Gap_penalty: 10.0
# Extend_penalty: 0.5
#
# Length: 23
# Identity:      3/23 (13.0%)
# Similarity:    8/23 (34.8%)
# Gaps:          10/23 (43.5%)
# Score: 18.0
#
#
#=====
```

```
Binding_pep2      1 REAKKQVEKDLANLTAELDKVKE      23
                   ...|:.:|:..:|
M5_similar_p2    1 STQKETLEREVQN-----      13
```

```
#-----
#-----
```

```
#####
# Program: needle
# Commandline: needle
#   -auto
#   -stdout
#   -asequence emboss_needle-I20210917-135644-0668-46832847-p2m.asequence
#   -bsequence emboss_needle-I20210917-135644-0668-46832847-p2m.bsequence
#   -datafile EBLOSUM62
#   -gapopen 10.0
#   -gapextend 0.5
#   -endopen 10.0
#   -endextend 0.5
#   -aformat3 pair
#   -sprotein1
#   -sprotein2
# Align_format: pair
# Report_file: stdout
#####
```

```
=====
#
# Aligned_sequences: 2
# 1: Binding_pep1
# 2: M8_similar_p1
# Matrix: EBLOSUM62
# Gap_penalty: 10.0
# Extend_penalty: 0.5
#
# Length: 25
# Identity:      6/25 (24.0%)
# Similarity:    13/25 (52.0%)
# Gaps:          2/25 ( 8.0%)
# Score: 17.5
#
#
=====
```

```
Binding_pep1      1 KALELAIDQASQDYNR--ANVLEKE      23
                   :..|...:::..|:|..|  ...|::|
M8_similar_p1    1 EEKEKNLEKKSEDVERHYLKKLDQE      25
```

```
#-----
#-----
```



```
#####
# Program: needle
# Commandline: needle
#   -auto
#   -stdout
#   -asequence emboss_needle-I20210917-135804-0655-27464049-p2m.asequence
#   -bsequence emboss_needle-I20210917-135804-0655-27464049-p2m.bsequence
#   -datafile EBLOSUM62
#   -gapopen 10.0
#   -gapextend 0.5
#   -endopen 10.0
#   -endextend 0.5
#   -aformat3 pair
#   -sprotein1
#   -sprotein2
# Align_format: pair
# Report_file: stdout
#####
```

```
=====
#
# Aligned_sequences: 2
# 1: Binding_pep2
# 2: M8_similar_p2
# Matrix: EBLOSUM62
# Gap_penalty: 10.0
# Extend_penalty: 0.5
#
# Length: 23
# Identity:      10/23 (43.5%)
# Similarity:    13/23 (56.5%)
# Gaps:          3/23 (13.0%)
# Score: 34.0
#
#
=====
```

```
Binding_pep2      1 REAKKQVEKDLANLTAELDKVKE      23
                   .||.:...:||  |.||..|:||
M8_similar_p2    1 LEASRAAKKD---LEAEHQKLKE      20
```

```
#-----
#-----
```

```
#####
# Program: needle
# Commandline: needle
#   -auto
#   -stdout
#   -asequence emboss_needle-I20210917-135919-0762-92494436-p2m.asequence
#   -bsequence emboss_needle-I20210917-135919-0762-92494436-p2m.bsequence
#   -datafile EBLOSUM62
#   -gapopen 10.0
#   -gapextend 0.5
#   -endopen 10.0
#   -endextend 0.5
#   -aformat3 pair
#   -sprotein1
#   -sprotein2
# Align_format: pair
# Report_file: stdout
#####
```

```
=====
#
# Aligned_sequences: 2
# 1: Binding_pep1
# 2: M12_similar_p1
# Matrix: EBLOSUM62
# Gap_penalty: 10.0
# Extend_penalty: 0.5
#
# Length: 23
# Identity:      7/23 (30.4%)
# Similarity:    12/23 (52.2%)
# Gaps:          0/23 ( 0.0%)
# Score: 29.0
#
#
=====
```

```
Binding_pep1      1 KALELAIDQASQDYNRANVLEKE      23
                   |.:|.|:..|:.....|.||
M12_similar_p     1 KQVEKALEEANSKLAALEKLNKE      23
```

```
#-----
#-----
```

```
#####
# Program: needle
# Commandline: needle
#   -auto
#   -stdout
#   -asequence emboss_needle-I20210917-140032-0915-10411681-p2m.asequence
#   -bsequence emboss_needle-I20210917-140032-0915-10411681-p2m.bsequence
#   -datafile EBLOSUM62
#   -gapopen 10.0
#   -gapextend 0.5
#   -endopen 10.0
#   -endextend 0.5
#   -aformat3 pair
#   -sprotein1
#   -sprotein2
# Align_format: pair
# Report_file: stdout
#####
```

```
=====
#
# Aligned_sequences: 2
# 1: Binding_pep2
# 2: M12_similar_p2
# Matrix: EBLOSUM62
# Gap_penalty: 10.0
# Extend_penalty: 0.5
#
# Length: 23
# Identity:      23/23 (100.0%)
# Similarity:    23/23 (100.0%)
# Gaps:          0/23 ( 0.0%)
# Score: 110.0
#
#
=====
```

```
Binding_pep2      1 REAKKQVEKDLANLTAELDKVKE      23
                   |||
M12_similar_p     1 REAKKQVEKDLANLTAELDKVKE      23
```

```
#-----
#-----
```

```
#####
# Program: needle
# Commandline: needle
#   -auto
#   -stdout
#   -asequence emboss_needle-I20210917-140131-0771-94163540-p2m.asequence
#   -bsequence emboss_needle-I20210917-140131-0771-94163540-p2m.bsequence
#   -datafile EBLOSUM62
#   -gapopen 10.0
#   -gapextend 0.5
#   -endopen 10.0
#   -endextend 0.5
#   -aformat3 pair
#   -sprotein1
#   -sprotein2
# Align_format: pair
# Report_file: stdout
#####
```

```
=====
#
# Aligned_sequences: 2
# 1: Binding_pep1
# 2: M28_similar_p1
# Matrix: EBLOSUM62
# Gap_penalty: 10.0
# Extend_penalty: 0.5
#
# Length: 23
# Identity:      6/23 (26.1%)
# Similarity:    10/23 (43.5%)
# Gaps:          0/23 ( 0.0%)
# Score: 22.0
#
#
=====
```

```
Binding_pep1      1 KALELAIDQASQDYNRANVLEKE      23
                   |.:|...:|:.....|.||
M28_similar_p     1 KKVEADLAEANSKQLQALEKLNKE      23
```

```
#-----
#-----
```

```
#####
# Program: needle
# Commandline: needle
#   -auto
#   -stdout
#   -asequence emboss_needle-I20210917-140229-0375-95050436-p2m.asequence
#   -bsequence emboss_needle-I20210917-140229-0375-95050436-p2m.bsequence
#   -datafile EBLOSUM62
#   -gapopen 10.0
#   -gapextend 0.5
#   -endopen 10.0
#   -endextend 0.5
#   -aformat3 pair
#   -sprotein1
#   -sprotein2
# Align_format: pair
# Report_file: stdout
#####
```

```
#=====
#
# Aligned_sequences: 2
# 1: Binding_pep2
# 2: M28_similar_p2
# Matrix: EBLOSUM62
# Gap_penalty: 10.0
# Extend_penalty: 0.5
#
# Length: 23
# Identity:      11/23 (47.8%)
# Similarity:    17/23 (73.9%)
# Gaps:          0/23 ( 0.0%)
# Score: 54.0
#
#
#=====
```

```
Binding_pep2      1 REAKKQVEKDLANLTAELDKVKE      23
                   |||||:|.|||. . . . :|. . . . :
M28_similar_p     1 REAKKKVEADLAEANSKLALEK      23
```

```
#-----
#-----
```

```
#####
# Program: needle
# Commandline: needle
#   -auto
#   -stdout
#   -asequence emboss_needle-I20210917-140324-0121-43219167-p2m.asequence
#   -bsequence emboss_needle-I20210917-140324-0121-43219167-p2m.bsequence
#   -datafile EBLOSUM62
#   -gapopen 10.0
#   -gapextend 0.5
#   -endopen 10.0
#   -endextend 0.5
#   -aformat3 pair
#   -sprotein1
#   -sprotein2
# Align_format: pair
# Report_file: stdout
#####
```

```
=====
#
# Aligned_sequences: 2
# 1: Binding_pep1
# 2: M75_similar_p1
# Matrix: EBLOSUM62
# Gap_penalty: 10.0
# Extend_penalty: 0.5
#
# Length: 23
# Identity:      6/23 (26.1%)
# Similarity:    10/23 (43.5%)
# Gaps:          0/23 ( 0.0%)
# Score: 22.0
#
#
=====
```

```
Binding_pep1      1 KALELAIDQASQDYNRANVLEKE      23
                   |.:|...:|:.....|.||
M75_similar_p     1 KKVEADLAEANSKQLQALEKLNKE      23
```

```
#-----
#-----
```

```
#####
# Program: needle
# Commandline: needle
#   -auto
#   -stdout
#   -asequence emboss_needle-I20210917-140421-0869-93139689-p2m.asequence
#   -bsequence emboss_needle-I20210917-140421-0869-93139689-p2m.bsequence
#   -datafile EBLOSUM62
#   -gapopen 10.0
#   -gapextend 0.5
#   -endopen 10.0
#   -endextend 0.5
#   -aformat3 pair
#   -sprotein1
#   -sprotein2
# Align_format: pair
# Report_file: stdout
#####
```

```
=====
#
# Aligned_sequences: 2
# 1: Binding_pep2
# 2: M75_similar_p2
# Matrix: EBLOSUM62
# Gap_penalty: 10.0
# Extend_penalty: 0.5
#
# Length: 23
# Identity:      17/23 (73.9%)
# Similarity:    19/23 (82.6%)
# Gaps:          0/23 ( 0.0%)
# Score: 76.0
#
#
=====
```

```
Binding_pep2      1 REAKKQVEKDLANLTAELDKVKE      23
                   |||||:|.|||.||||..|:|
M75_similar_p    1 REAKKKVEADLAALTAEHQKLKE      23
```

```
#-----
#-----
```

```
#####
# Program: needle
# Commandline: needle
#   -auto
#   -stdout
#   -asequence emboss_needle-I20210917-140533-0491-60880675-plm.asequence
#   -bsequence emboss_needle-I20210917-140533-0491-60880675-plm.bsequence
#   -datafile EBLOSUM62
#   -gapopen 10.0
#   -gapextend 0.5
#   -endopen 10.0
#   -endextend 0.5
#   -aformat3 pair
#   -sprotein1
#   -sprotein2
# Align_format: pair
# Report_file: stdout
#####
```

```
#=====
#
# Aligned_sequences: 2
# 1: Binding_pep1
# 2: M79_similar_p1
# Matrix: EBLOSUM62
# Gap_penalty: 10.0
# Extend_penalty: 0.5
#
# Length: 26
# Identity:      10/26 (38.5%)
# Similarity:    12/26 (46.2%)
# Gaps:          3/26 (11.5%)
# Score: 29.0
#
#
#=====
```

```
Binding_pep1      1 KALELAIDQASQDYN---RANVLEKE      23
                   ||.:...||...:|  ..|.|.||
M79_similar_p     1 KAAEIKKPQADSAWNPKEYNALLKE      26
```

```
#-----
#-----
```



```
#####
# Program: needle
# Commandline: needle
#   -auto
#   -stdout
#   -asequence emboss_needle-I20210917-140643-0717-60803203-p2m.asequence
#   -bsequence emboss_needle-I20210917-140643-0717-60803203-p2m.bsequence
#   -datafile EBLOSUM62
#   -gapopen 10.0
#   -gapextend 0.5
#   -endopen 10.0
#   -endextend 0.5
#   -aformat3 pair
#   -sprotein1
#   -sprotein2
# Align_format: pair
# Report_file: stdout
#####
```

```
=====
#
# Aligned_sequences: 2
# 1: Binding_pep2
# 2: M79_similar_p2
# Matrix: EBLOSUM62
# Gap_penalty: 10.0
# Extend_penalty: 0.5
#
# Length: 23
# Identity:      17/23 (73.9%)
# Similarity:    19/23 (82.6%)
# Gaps:          0/23 ( 0.0%)
# Score: 76.0
#
#
=====
```

```
Binding_pep2      1 REAKKQVEKDLANLTAELDKVKE      23
                   |||||:|.|||.||||..|:|
M79_similar_p    1 REAKKKVEADLAALTAEHQKLKE      23
```

```
#-----
#-----
```

```
#####
# Program: needle
# Commandline: needle
#   -auto
#   -stdout
#   -asequence emboss_needle-I20210917-140742-0256-53359928-p2m.asequence
#   -bsequence emboss_needle-I20210917-140742-0256-53359928-p2m.bsequence
#   -datafile EBLOSUM62
#   -gapopen 10.0
#   -gapextend 0.5
#   -endopen 10.0
#   -endextend 0.5
#   -aformat3 pair
#   -sprotein1
#   -sprotein2
# Align_format: pair
# Report_file: stdout
#####
```

```
=====
#
# Aligned_sequences: 2
# 1: Binding_pep1
# 2: M81_similar_p1
# Matrix: EBLOSUM62
# Gap_penalty: 10.0
# Extend_penalty: 0.5
#
# Length: 23
# Identity:      6/23 (26.1%)
# Similarity:    10/23 (43.5%)
# Gaps:          0/23 ( 0.0%)
# Score: 22.0
#
#
=====
```

```
Binding_pep1      1 KALELAIDQASQDYNRANVLEKE      23
                   |.:|...:|:.....|.||
M81_similar_p     1 KKVEADLAEANSKQLQALEKLNKE      23
```

```
#-----
#-----
```

```
#####
# Program: needle
# Commandline: needle
#   -auto
#   -stdout
#   -asequence emboss_needle-I20210917-140900-0106-40553270-p2m.asequence
#   -bsequence emboss_needle-I20210917-140900-0106-40553270-p2m.bsequence
#   -datafile EBLOSUM62
#   -gapopen 10.0
#   -gapextend 0.5
#   -endopen 10.0
#   -endextend 0.5
#   -aformat3 pair
#   -sprotein1
#   -sprotein2
# Align_format: pair
# Report_file: stdout
#####
```

```
=====
#
# Aligned_sequences: 2
# 1: Binding_pep2
# 2: M81_similar_p2
# Matrix: EBLOSUM62
# Gap_penalty: 10.0
# Extend_penalty: 0.5
#
# Length: 23
# Identity:      17/23 (73.9%)
# Similarity:    19/23 (82.6%)
# Gaps:          0/23 ( 0.0%)
# Score: 76.0
#
#
=====
```

```
Binding_pep2      1 REAKKQVEKDLANLTAELDKVKE      23
                   |||||:|.|||.||||..|:|
M81_similar_p     1 REAKKKVEADLAALTAEHQKLKE      23
```

```
#-----
#-----
```

```
#####
# Program: needle
# Commandline: needle
#   -auto
#   -stdout
#   -asequence emboss_needle-I20210917-140947-0333-77671278-plm.asequence
#   -bsequence emboss_needle-I20210917-140947-0333-77671278-plm.bsequence
#   -datafile EBLOSUM62
#   -gapopen 10.0
#   -gapextend 0.5
#   -endopen 10.0
#   -endextend 0.5
#   -aformat3 pair
#   -sprotein1
#   -sprotein2
# Align_format: pair
# Report_file: stdout
#####
```

```
=====
#
# Aligned_sequences: 2
# 1: Binding_pep1
# 2: M87_similar_p1
# Matrix: EBLOSUM62
# Gap_penalty: 10.0
# Extend_penalty: 0.5
#
# Length: 34
# Identity:      9/34 (26.5%)
# Similarity:   15/34 (44.1%)
# Gaps:         11/34 (32.4%)
# Score: 32.0
#
#
=====
```

```
Binding_pep1      1 KALELAIDQASQDYNRA-----NVLEKE      23
                   ..||..:::|.::|:..           :.||||
M87_similar_p     1 SKLEKQLEEAQKDYSEIEGKLEQFWHDYDKLEKE  34
```

```
#-----
#-----
```

```
#####
# Program: needle
# Commandline: needle
#   -auto
#   -stdout
#   -asequence emboss_needle-I20210917-141049-0262-1155708-p2m.asequence
#   -bsequence emboss_needle-I20210917-141049-0262-1155708-p2m.bsequence
#   -datafile EBLOSUM62
#   -gapopen 10.0
#   -gapextend 0.5
#   -endopen 10.0
#   -endextend 0.5
#   -aformat3 pair
#   -sprotein1
#   -sprotein2
# Align_format: pair
# Report_file: stdout
#####
```

```
=====
#
# Aligned_sequences: 2
# 1: Binding_pep2
# 2: M87_similar_p2
# Matrix: EBLOSUM62
# Gap_penalty: 10.0
# Extend_penalty: 0.5
#
# Length: 23
# Identity:      10/23 (43.5%)
# Similarity:    13/23 (56.5%)
# Gaps:          7/23 (30.4%)
# Score: 35.0
#
#
=====
```

```
Binding_pep2      1 REAKKQVEKDLANLTAELDKVKE      23
                   |.|||:|          ||..:|
M87_similar_p     1 RAAKKELE-----AEHQKLKE      16
```

```
#-----
#-----
```

```
#####
# Program: needle
# Commandline: needle
#   -auto
#   -stdout
#   -asequence emboss_needle-I20210917-141135-0412-59042471-p2m.asequence
#   -bsequence emboss_needle-I20210917-141135-0412-59042471-p2m.bsequence
#   -datafile EBLOSUM62
#   -gapopen 10.0
#   -gapextend 0.5
#   -endopen 10.0
#   -endextend 0.5
#   -aformat3 pair
#   -sprotein1
#   -sprotein2
# Align_format: pair
# Report_file: stdout
#####
```

```
=====
#
# Aligned_sequences: 2
# 1: Binding_pep1
# 2: M89_similar_p1
# Matrix: EBLOSUM62
# Gap_penalty: 10.0
# Extend_penalty: 0.5
#
# Length: 23
# Identity:      7/23 (30.4%)
# Similarity:   12/23 (52.2%)
# Gaps:         2/23 ( 8.7%)
# Score: 20.5
#
#
=====
```

```
Binding_pep1      1 KALELAIDQASQDYNRANVLEKE      23
                   ||.|.:...:..|.|. |::|
M89_similar_p     1 KAKEKSENVERHYLRK--LDQE      21
```

```
#-----
#-----
```

```
#####
# Program: needle
# Commandline: needle
#   -auto
#   -stdout
#   -asequence emboss_needle-I20210917-141215-0123-81889031-plm.asequence
#   -bsequence emboss_needle-I20210917-141215-0123-81889031-plm.bsequence
#   -datafile EBLOSUM62
#   -gapopen 10.0
#   -gapextend 0.5
#   -endopen 10.0
#   -endextend 0.5
#   -aformat3 pair
#   -sprotein1
#   -sprotein2
# Align_format: pair
# Report_file: stdout
#####
```

```
#=====
#
# Aligned_sequences: 2
# 1: Binding_pep2
# 2: M89_similar_p2
# Matrix: EBLOSUM62
# Gap_penalty: 10.0
# Extend_penalty: 0.5
#
# Length: 23
# Identity:      17/23 (73.9%)
# Similarity:   19/23 (82.6%)
# Gaps:         0/23 ( 0.0%)
# Score: 76.0
#
#
#=====
```

```
Binding_pep2      1 REAKKQVEKDLANLTAELDKVKE      23
                   |||||:|.|||.||||..|:|
M89_similar_p    1 REAKKKVEADLAALTAEHQKLKE      23
```

```
#-----
#-----
```

```
#####
# Program: needle
# Commandline: needle
#   -auto
#   -stdout
#   -asequence emboss_needle-I20210917-141302-0615-69440915-plm.asequence
#   -bsequence emboss_needle-I20210917-141302-0615-69440915-plm.bsequence
#   -datafile EBLOSUM62
#   -gapopen 10.0
#   -gapextend 0.5
#   -endopen 10.0
#   -endextend 0.5
#   -aformat3 pair
#   -sprotein1
#   -sprotein2
# Align_format: pair
# Report_file: stdout
#####
```

```
=====
#
# Aligned_sequences: 2
# 1: Binding_pep1
# 2: M179_similar_p1
# Matrix: EBLOSUM62
# Gap_penalty: 10.0
# Extend_penalty: 0.5
#
# Length: 23
# Identity:      7/23 (30.4%)
# Similarity:   12/23 (52.2%)
# Gaps:         0/23 ( 0.0%)
# Score: 29.0
#
#
=====
```

```
Binding_pep1      1 KALELAIDQASQDYNRANVLEKE      23
                   |.:|.|:..|:.....|.||
M179_similar_    1 KQVEKALEEANSKLAALEKLNKE      23
```

```
#-----
#-----
```



```
#####
# Program: needle
# Commandline: needle
#   -auto
#   -stdout
#   -asequence emboss_needle-I20210917-141404-0386-78941509-plm.asequence
#   -bsequence emboss_needle-I20210917-141404-0386-78941509-plm.bsequence
#   -datafile EBLOSUM62
#   -gapopen 10.0
#   -gapextend 0.5
#   -endopen 10.0
#   -endextend 0.5
#   -aformat3 pair
#   -sprotein1
#   -sprotein2
# Align_format: pair
# Report_file: stdout
#####
```

```
=====
#
# Aligned_sequences: 2
# 1: Binding_pep2
# 2: M179_similar_p2
# Matrix: EBLOSUM62
# Gap_penalty: 10.0
# Extend_penalty: 0.5
#
# Length: 23
# Identity:      23/23 (100.0%)
# Similarity:    23/23 (100.0%)
# Gaps:          0/23 ( 0.0%)
# Score: 110.0
#
#
=====
```

```
Binding_pep2      1 REAKKQVEKDLANLTAELDKVKE      23
                   |||
M179_similar_    1 REAKKQVEKDLANLTAELDKVKE      23
```

```
#-----
#-----
```

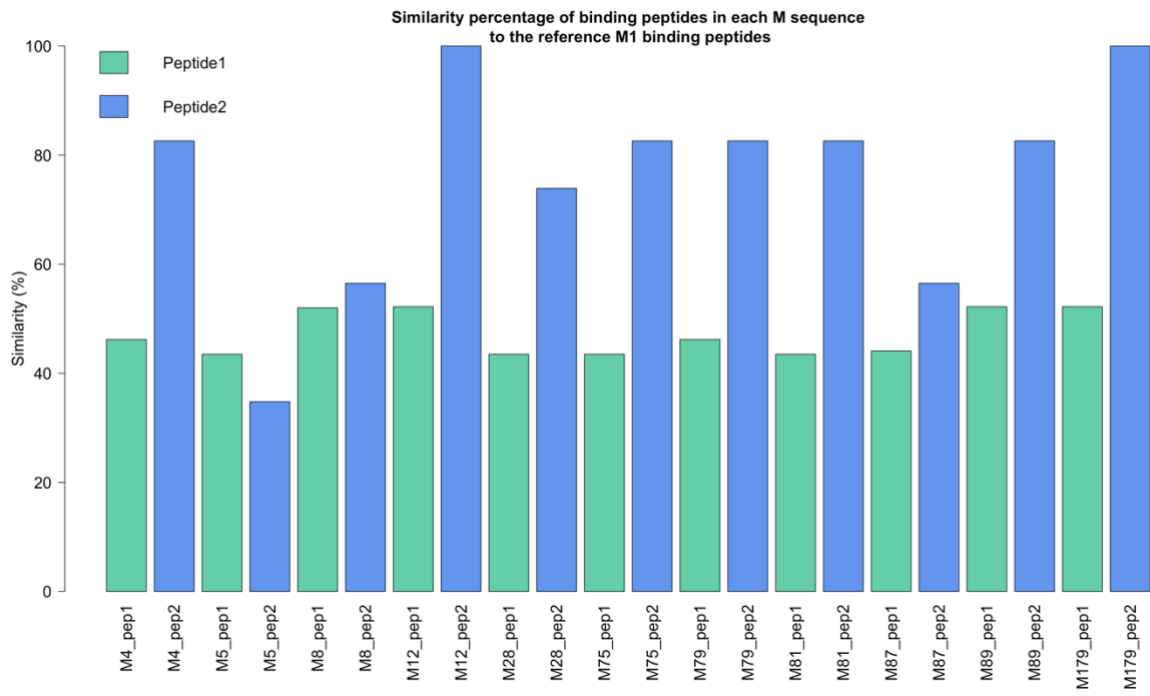

Figure S2. Similarity percentage for binding peptides of M1 against most similar peptide in each M sequence



```

#####
# Program: needle
# Rundate: Wed 6 Oct 2021 09:51:02
# Commandline: needle
#   -auto
#   -stdout
#   -asequence emboss_needle-I20211006-095058-0469-54470083-p2m.asequence
#   -bsequence emboss_needle-I20211006-095058-0469-54470083-p2m.bsequence
#   -datafile EBLOSUM62
#   -gapopen 10.0
#   -gapextend 0.5
#   -endopen 10.0
#   -endextend 0.5
#   -aformat3 pair
#   -sprotein1
#   -sprotein2
# Align_format: pair
# Report_file: stdout
#####

#=====
#
# Aligned_sequences: 2
# 1: Ref_M79_sequence
# 2: M4_sequence
# Matrix: EBLOSUM62
# Gap_penalty: 10.0
# Extend_penalty: 0.5
#
# Length: 222
# Identity:      222/222 (100.0%)
# Similarity:    222/222 (100.0%)
# Gaps:          0/222 ( 0.0%)
# Score: 1113.0
#
#
#=====

Ref_M79_seque      1  MARKDNTNKQYSLRKLKTGTASVAVAVAVLGGAGFANQTEVKAAEIKKPQAD      50
  |||
M4_sequence        1  MARKDNTNKQYSLRKLKTGTASVAVAVAVLGGAGFANQTEVKAAEIKKPQAD      50

Ref_M79_seque     51  SAWNWPKEYNALLKENEELKVEREKYLSYADDKEKDPQYRALMGENQDLR      100
  |||
M4_sequence       51  SAWNWPKEYNALLKENEELKVEREKYLSYADDKEKDPQYRALMGENQDLR      100

Ref_M79_seque    101  KREGQYQDKIEELEKERKEKQERQEQLEQYQIEADKHYQEQQKKHQEQ      150
  |||
M4_sequence      101  KREGQYQDKIEELEKERKEKQERQEQLEQYQIEADKHYQEQQKKHQEQ      150

Ref_M79_seque    151  QQLEAEKQKLAKDKQISDASRQGLSRDLEASREAKKKVEADLAALTAEHQ      200
  |||
M4_sequence      151  QQLEAEKQKLAKDKQISDASRQGLSRDLEASREAKKKVEADLAALTAEHQ      200

Ref_M79_seque    201  KLKEDKQISDASRQGLSRDLEA      222
  |||
M4_sequence      201  KLKEDKQISDASRQGLSRDLEA      222

#-----
#-----

```













```
#####
# Program: needle
# Rundate: Wed 6 Oct 2021 10:07:10
# Commandline: needle
# -auto
# -stdout
# -asequence emboss_needle-I20211006-100706-0795-49043706-p2m.asequence
# -bsequence emboss_needle-I20211006-100706-0795-49043706-p2m.bsequence
# -datafile EBLOSUM62
# -gapopen 10.0
# -gapextend 0.5
# -endopen 10.0
# -endextend 0.5
# -aformat3 pair
# -sprotein1
# -sprotein2
# Align_format: pair
# Report_file: stdout
#####
```

```
=====
#
# Aligned_sequences: 2
# 1: Ref_M79_sequence
# 2: M81_sequence
# Matrix: EBLOSUM62
# Gap_penalty: 10.0
# Extend_penalty: 0.5
#
# Length: 223
# Identity: 124/223 (55.6%)
# Similarity: 148/223 (66.4%)
# Gaps: 18/223 ( 8.1%)
# Score: 509.5
#
#
=====
```

|               |     |                                |                        |     |
|---------------|-----|--------------------------------|------------------------|-----|
| Ref_M79_seque | 1   | MARKDTNKQYSLRKLKTGTASVAVAVAVL  | GAGFANQTEVKAAEIKKPQAD  | 50  |
|               |     | .                              |                        | .   |
| M81_sequence  | 1   | MVRKDTNKQYSLRKLKTGTASVAVAVAVL  | GAGFANQTEVKA-----AG    | 43  |
| Ref_M79_seque | 51  | SAWNWPK-EYNALLKENEELKVEREKYLSY | ADDKEKDPQYRALMGENQDL   | 99  |
|               |     | .                              | :                      | :   |
| M81_sequence  | 44  | SEENVPKQQYNALWEENEDLRGRERKYIAK | LEKEE--IQNGELNEKNRKL   | 91  |
| Ref_M79_seque | 100 | RKREGQYQDKIEELEKERKEKQERQQLER  | QYQIEADKHYQEQQKHKHQQE  | 149 |
|               |     | .....                          | .                      | :   |
| M81_sequence  | 92  | EADIADLQDVIEDNDQEIKRK-----     | DRMYEAFI-KQSKDQVKDLTAE | 133 |
| Ref_M79_seque | 150 | QQQLEAEKQKLAKDKQISDASRQGLSRD   | LEASREAKKVEADLAALTAEH  | 199 |
|               |     | :..                            | .....                  | :   |
| M81_sequence  | 134 | KDTLAEKAKKLEEDKQISDASRKSLSRD   | LEGSRAAKKELEAKHQKLETEH | 183 |
| Ref_M79_seque | 200 | QKLKEDKQISDASRQGLSRDLEA        | 222                    |     |
|               |     |                                |                        |     |
| M81_sequence  | 184 | QKLKEDKQISDASRQGLSRDLEA        | 206                    |     |

```
#-----
#-----
```





```
#####
# Program: needle
# Rundate: Wed 6 Oct 2021 10:13:16
# Commandline: needle
# -auto
# -stdout
# -asequence emboss_needle-I20211006-101315-0196-46816129-p2m.asequence
# -bsequence emboss_needle-I20211006-101315-0196-46816129-p2m.bsequence
# -datafile EBLOSUM62
# -gapopen 10.0
# -gapextend 0.5
# -endopen 10.0
# -endextend 0.5
# -aformat3 pair
# -sprotein1
# -sprotein2
# Align_format: pair
# Report_file: stdout
#####
```

```
=====
#
# Aligned_sequences: 2
# 1: Ref_M79_sequence
# 2: M179_sequence
# Matrix: EBLOSUM62
# Gap_penalty: 10.0
# Extend_penalty: 0.5
#
# Length: 289
# Identity: 118/289 (40.8%)
# Similarity: 154/289 (53.3%)
# Gaps: 72/289 (24.9%)
# Score: 447.0
#
#
=====
```

|               |     |                                 |                           |     |
|---------------|-----|---------------------------------|---------------------------|-----|
| Ref_M79_seque | 1   | MARKDNTNKQYSLRKLKLTGTASVAVAVAVL | GAGFA-NQTEVKA AEI-----    | 44  |
| M179_sequence | 1   | MVRKDTNRHYSLRKLKLTGTASVAVALSVL  | GAGLAVNQTEVSAKSVTRSTA     | 50  |
| Ref_M79_seque | 45  | ----KKPQADSAW-----NWPKEYNALL    | KENEEL-----               | 69  |
| M179_sequence | 51  | QDPDKSRQAI TEYEVENHKLTQEKNAL    | TNRNQELTDENGELKTANEALRQ   | 100 |
| Ref_M79_seque | 70  | -----KVEREKYLSYADDKEKDPQY       | RALMGENQDLRKREGQYQDKIE    | 111 |
| M179_sequence | 101 | RGDTLNFNRVKLEKQV----QEKEHNNK    | TLKIENGELKTENGDLTKKLD     | 145 |
| Ref_M79_seque | 112 | ELEKERKEKQERQEQLERQY----QIE     | ADKHYQEQQK-----           | 144 |
| M179_sequence | 146 | ETRQELANKQQESKENEKTLNELLEK      | TVKDKIAKEQENKETIGTLKKLLD  | 195 |
| Ref_M79_seque | 145 | -----KHQQEQQLEAEKQKLA           | KDKQ---ISDASRQGLSRDLEASRE | 183 |
| M179_sequence | 196 | ETVKDKIAKEQKSKQDFGALKQELAK      | KKEEQNKISDASRQGLRRDLNASRE | 245 |
| Ref_M79_seque | 184 | AKKKVEADLAALTAEHQKLEKEDKQI      | SDASRQGLSRDLEA            | 222 |
| M179_sequence | 246 | AKKQVEKDLANLTAELDKVKEEKQV       | SDASRQGLRRDLDA            | 284 |

```
-----
#-----
```

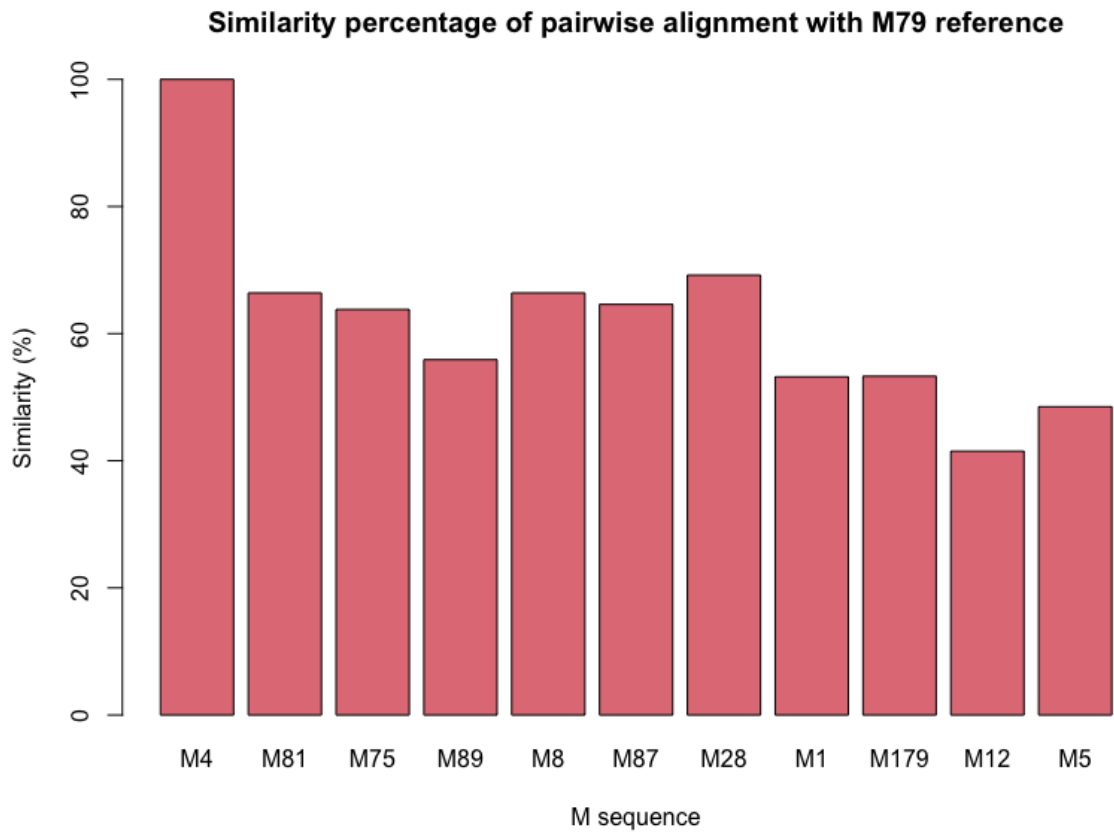

Figure S3. Similarity percentage for truncated M sequences against M79 partial reference sequence
