# Supplementary material for: A human monoclonal antibody bivalently binding two different epitopes in streptococcal M protein mediates immune function
Source: PubMed Central journal article supplement (PMC9906385; doi:10.15252/emmm.202216208), 2022-12-12
Supplement: EMMM-15-e16208-s004.pdf [file EMMM-15-e16208-s004.pdf]

| Cross-link no. | Peptide1                   | Peptide2                         | Protein1         | Protein2   | Cross-link distance (Å) | Spectrum no. in Fig. S4 |
|----------------|----------------------------|----------------------------------|------------------|------------|-------------------------|-------------------------|
| 1              | <b>K</b> ALELAIDQASQDYNR   | DNSKNTLYLQMNSLR                  | M1-B2 repeat     | AB25-heavy | 21.7                    | A                       |
| 2              | <b>K</b> ALELAIDQASQDYNR   | SYPHKR                           | M1-B2 repeat     | AB25-heavy | 35.4                    | B                       |
| 3              | ANVLEKELETITR              | DNSKNTLYLQMNSLR                  | M1-B3-S domain   | AB25-heavy | 12.7                    | C                       |
| 4              | QVEKDLANLTAELDK            | EAKVQWK                          | M1-C1-C2 repeats | AB25-light | 22.5                    | D                       |
| 5              | NKYYADSVK                  | DNSKNTLYLQMNSLR                  | AB25-heavy       | AB25-heavy | 39.3                    | E                       |
| 6              | GPSVFPLAPSSKSTSGGTAALGCLVK | VEPKSCDK                         | AB25-heavy       | AB25-heavy | 11.3                    | F                       |
| 7              | GPSVFPLAPSSKSTSGGTAALGCLVK | <b>H</b> KVYACEVTHQGLSSPVTK      | AB25-heavy       | AB25-light | 24.9                    | G                       |
| 8              | GPSVFPLAPSSKSTSGGTAALGCLVK | VYACEVTHQGLSSPVTKSFNR            | AB25-heavy       | AB25-light | 11.1                    | H                       |
| 9              | GPSVFPLAPSSKSTSGGTAALGCLVK | VDNALQSGNSQESVTEQDSKSTYLSSTLTLSK | AB25-heavy       | AB25-light | 18.0                    | I                       |
| 10             | DNSKNTLYLQMNSLR            | EAKVQWK                          | AB25-heavy       | AB25-light | 54.6                    | J                       |
| 11             | ANVLEKELETITR              | DNSKNTLYLQMNSLR                  | M1-B3-S domain   | AB49-heavy | 30.5                    | K                       |

**Table EV 1. Identified cross-linked peptides between M1, Ab25 and Ab49.** The cross-link number is indicated. For peptides 1 and 2, the cross-linked lysine residues are indicated in bold. Protein 1 and 2 indicate the parent proteins of the respective peptides. The cross-linked lysine residue distance is for each cross-link is given, and a reference to a corresponding spectrum in Figure EV 7.
